# Supplementary material for: Synthesis and Preclinical Evaluation of Radiolabeled [103Ru]BOLD-100
Source: MDPI journal article supplement (doi:10.3390/pharmaceutics15112626), 2023-11-15
Supplement: s1 [file s1]

## Supporting information

### Synthesis and preclinical evaluation of radiolabeled [<sup>103</sup>Ru]BOLD-100

*B. Happl,<sup>1,2,3</sup> M. Brandt,<sup>1,2,4</sup> T. Balber,<sup>1,2,4</sup> K. Benčurová,<sup>1,2</sup> Z. Talip,<sup>5</sup> A. Voegelé,<sup>6</sup> P. Heffeter,<sup>7,8</sup> W. Kandioller,<sup>3,8</sup> N. P. van der Meulen,<sup>5,6</sup> M. Mitterhauser,<sup>1,2,3,4</sup> M. Hacker,<sup>2</sup> B. K. Keppler,<sup>3,8</sup> and T. L. Mindt<sup>1,2,3,4\*</sup>*

<sup>1</sup> Ludwig Boltzmann Institute Applied Diagnostics, General Hospital of Vienna, Waehringer Guertel 18-20, 1090 Vienna, Austria

<sup>2</sup> Division of Nuclear Medicine, Department of Biomedical Imaging and Image Guided Therapy, Medical University of Vienna, Waehringer Guertel 18-20, 1090 Vienna, Austria

<sup>3</sup> Institute of Inorganic Chemistry, Faculty of Chemistry, University of Vienna, Waehringer Strasse 42, 1090 Vienna, Austria

<sup>4</sup> Joint Applied Medicinal Radiochemistry Facility, University of Vienna, Medical University of Vienna

<sup>5</sup> Center for Radiopharmaceutical Sciences, Paul Scherrer Institute, Forschungsstrasse 111, 5232 Villigen, Switzerland

<sup>6</sup> Laboratory of Radiochemistry, Paul Scherrer Institute, Forschungsstrasse 111, 5232 Villigen, Switzerland

<sup>7</sup> Institute of Cancer Research, Comprehensive Cancer Center, Medical University of Vienna, Borschkegasse 8A, 1090 Vienna, Austria

<sup>8</sup> Research Cluster “Translational Cancer Therapy Research”, Waehringer Strasse 42, 1090 Vienna, Austria

## Table of contents

|                               |    |
|-------------------------------|----|
| 1. ICP-MS parameter.....      | 3  |
| 2. Gamma spectrum.....        | 5  |
| 3. UV/Vis spectra .....       | 6  |
| 4. HPLC <sup>1</sup> .....    | 7  |
| 5. Cell viability curves..... | 11 |
| 6. Biodistribution data ..... | 12 |
| 7. References .....           | 16 |

## 1. ICP-MS parameter

An Agilent 7800 ICP-MS (Agilent Technologies, Tokyo, Japan) was being employed, which was equipped with an Agilent SPS 4 autosampler (Agilent Technologies, Tokyo, Japan) and a MicroMist nebulizer at a sample uptake rate of approx. 0.2 mL/min. The Agilent MassHunter software package (Workstation Software, Version C.01.04, 2018) was used for data evaluation. The instrumental parameters for the ICP-MS are summarized in **Table S1** Error! Reference source not found..

**Table S1:** Instrumental parameters for the ICP-MS measurements

|                        |                                                           |
|------------------------|-----------------------------------------------------------|
| RF power               | 1550 W                                                    |
| Sampling depth         | 6.3 mm                                                    |
| Nebulizer              | MicroMist                                                 |
| Spray chamber          | Scott double-pass                                         |
| Spraying chamber temp. | 2°C                                                       |
| Monitored Isotopes     | $^{101}\text{Ru}$ , $^{102}\text{Ru}$ , $^{115}\text{In}$ |
| Measurement mode       | no gas                                                    |
| Plasma gas             | 15 L min <sup>-1</sup>                                    |
| Nebulizer gas          | 1.06 L min <sup>-1</sup>                                  |
| Auxiliary gas          | 0.90 L min <sup>-1</sup>                                  |
| Cones                  | Ni                                                        |
| Cell entrance          | -60 V                                                     |
| Cell exit              | -110 V                                                    |
| Integration time       | 0.1 s                                                     |
| Replicates             | 10                                                        |

The instrumental limit of quantification (LOQ) was determined at the start of the measurement by measuring a blank (3% HNO<sub>3</sub>) 5 times and was found to be 4.3 ng/L.

$$\text{LOQ} = \text{blank average} + 10 \times \text{STD}$$

Blank corrections were performed for all the samples. Robustness was ensured by tuning the ICP-MS on a daily basis, by using an internal standard ( $^{115}\text{In}$ ) and measuring calibration standards for each measurement.

### **Chemicals and reagents**

Ultrapure water (18.2 MΩ cm, ELGA Water purification system, Purelab Ultra MK 2, UK or 18.2 MΩ cm, Milli-Q Advantage, Darmstadt, Germany), HNO<sub>3</sub> (≥69%, Rotipuran Supra, Carl Roth, Karlsruhe, Germany) and H<sub>2</sub>O<sub>2</sub> (30%, Suprapur, Merck, Darmstadt, Germany) were used for all dilutions for ICP-MS measurements. The Ru standard solution was purchased from Labkings (Hilversum, The Netherlands).

### **Digestion of the samples**

For the digestion, approx. 25–50 mg of each organ sample were weighed into PFA-tubes, with 2 mL HNO<sub>3</sub> and 100 μL H<sub>2</sub>O<sub>2</sub> being added. The solutions were then placed on a hot plate and heated up for 6 hours using a temperature program with a maximum temperature of 200 °C. After cooling down, the liquids were transferred directly to 15 mL tubes with the remaining solution being removed from the PFA tubes by washing twice with 4 mL ultrapure water, resulting in a final volume of about 10 mL. By writing down the total weight of the resulting liquid, the dilution factor could be calculated.

## 2. Gamma spectrum

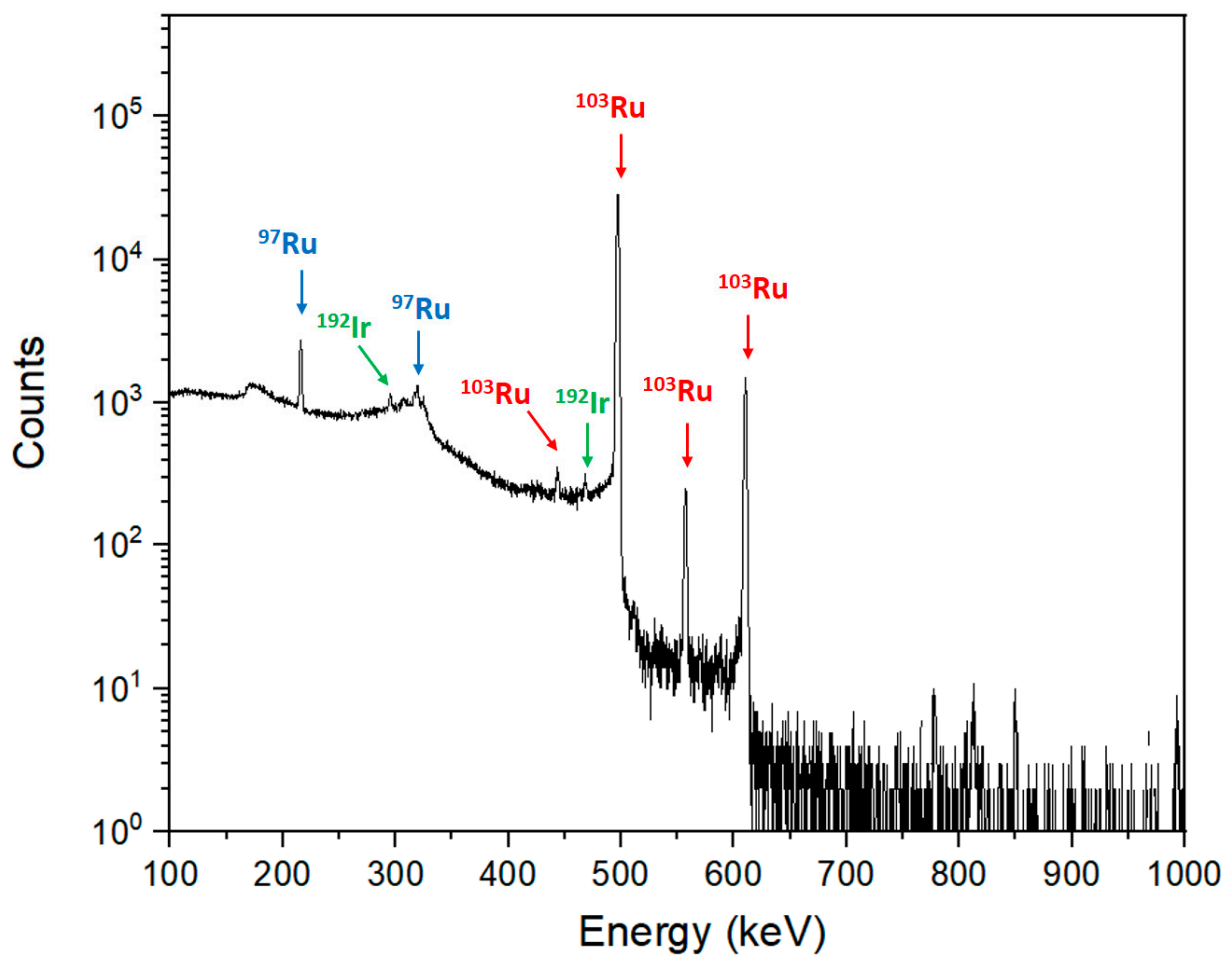

**Figure S1:** Representative  $\gamma$ -ray spectrum of  $[\text{}^{103}\text{Ru}]\text{RuCl}_3$ . Due to the irradiation of natural Ru, traces of  $^{97}\text{Ru}$  ( $t_{1/2} = 2.9$  d) as well as  $^{192}\text{Ir}$  ( $t_{1/2} = 73.83$  d) were observed.

### 3. UV/Vis spectra

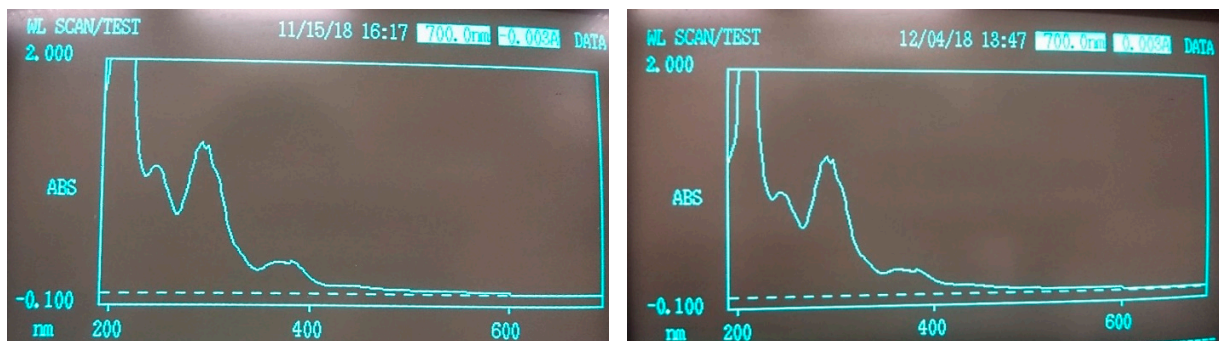

**Figure S2:** UV/Vis spectrum of **1a** (left, 0.068 mM) and **1b** (right, 0.059 mM),  $\lambda_{\text{max}} = \sim 300$  nm

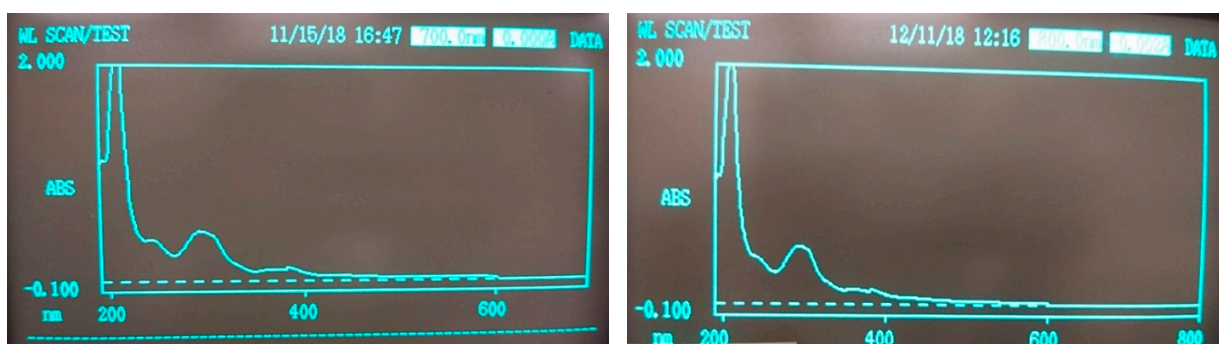

**Figure S3:** UV/Vis spectrum of **2a** (left, 0.027 mM) and **2b** (right, 0.035 mM),  $\lambda_{\text{max}} = \sim 300$  nm

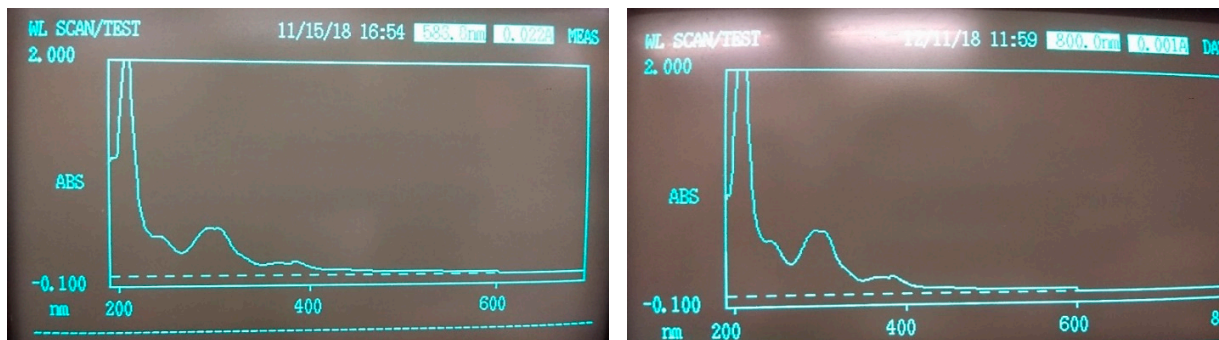

**Figure S4:** UV/Vis spectrum of **3a** (left, 0.025 mM) and **3b** (right, 0.035 mM),  $\lambda_{\text{max}} = \sim 300$  nm

## 4. HPLC<sup>1</sup>

All impurities resulted from the dissolution of the samples in the HPLC starting conditions (10% ACN + 0.1% TFA, 90% H<sub>2</sub>O + 0.1% TFA).

### 4.1 UV chromatograms of non-radioactive complexes

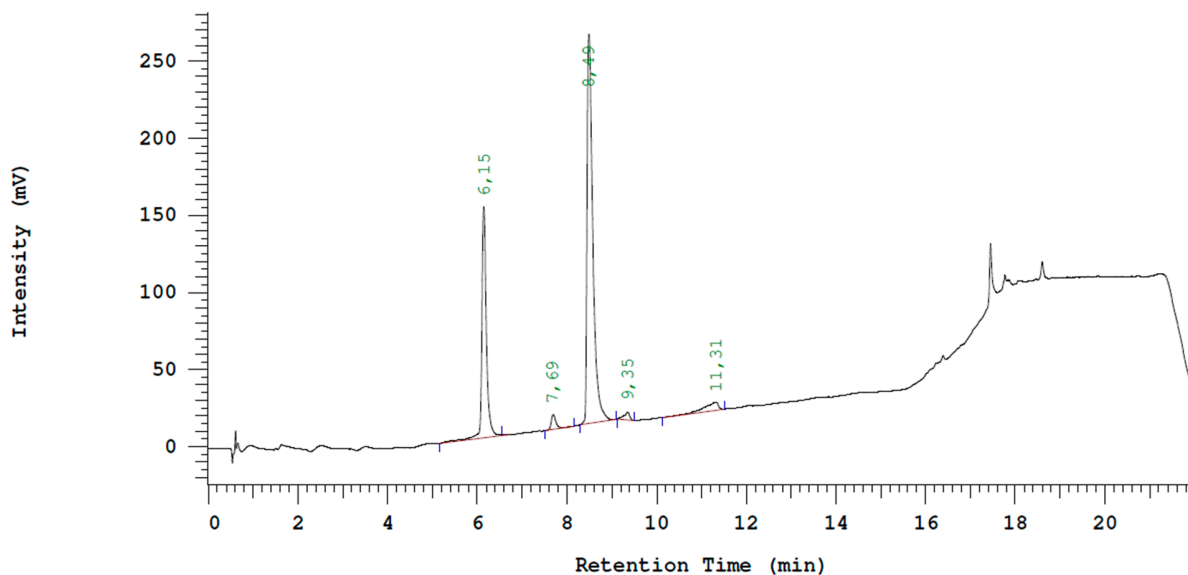

**Figure S5:** UV chromatogram of **1a** (220 nm, 20  $\mu$ L injection, manually integrated);  $t_R$  (Hind<sup>+</sup>) = 6.15 min,  $t_R$  ([Ru(ind)<sub>2</sub>Cl<sub>4</sub>]<sup>−</sup>) = 8.49 min,  $t_R$  ([Ru(ind)<sub>2</sub>Cl<sub>3</sub>(H<sub>2</sub>O)]) = 9.35 min,  $t_R$  ([Ru(ind)<sub>2</sub>Cl<sub>3</sub>(ACN)]) = 11.31 min.

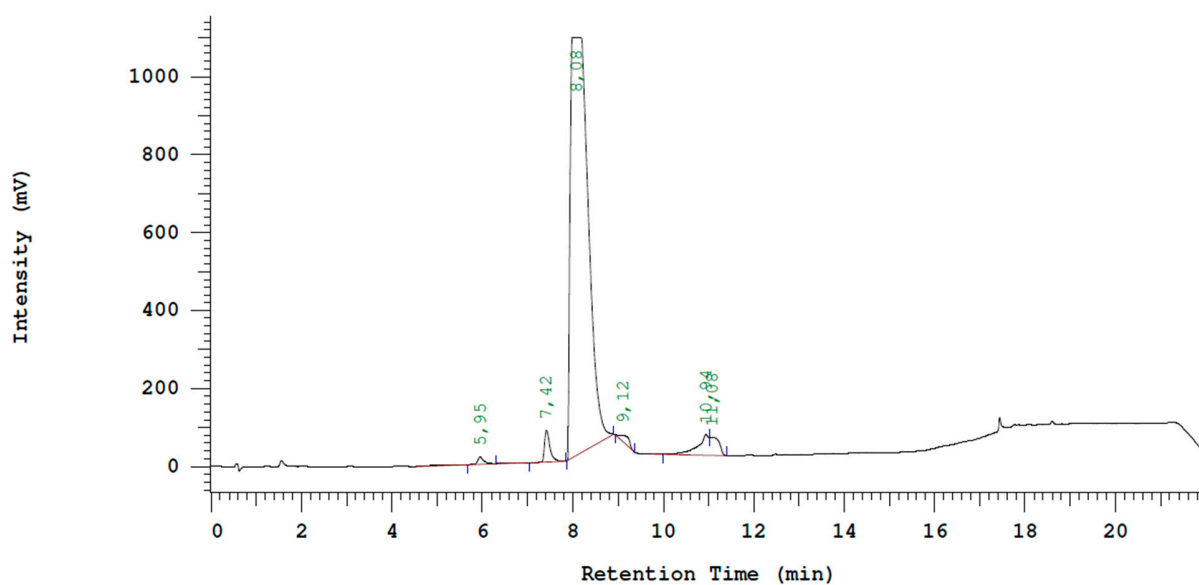

**Figure S6:** UV chromatogram of **2a** (220 nm, 20  $\mu$ L injection, manually integrated);  $t_R$  ([Ru(ind)<sub>2</sub>Cl<sub>4</sub>]<sup>−</sup>) = 8.08 min,  $t_R$  ([Ru(ind)<sub>2</sub>Cl<sub>3</sub>(H<sub>2</sub>O)]) = 9.12 min,  $t_R$  ([Ru(ind)<sub>2</sub>Cl<sub>3</sub>(ACN)]) = 10.94, 11.08 min.

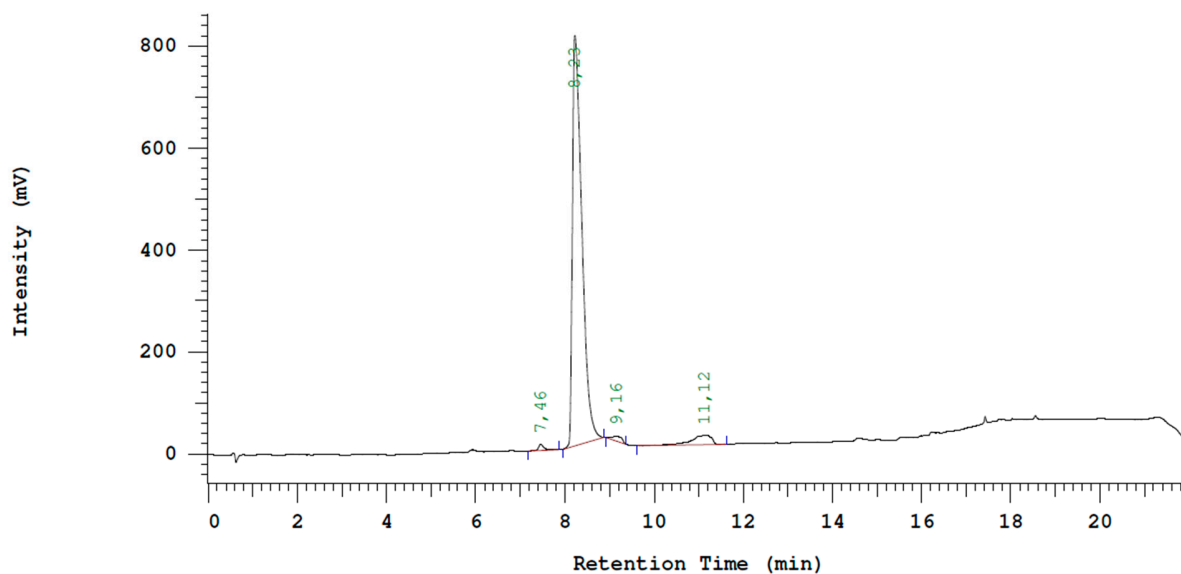

**Figure S7:** UV chromatogram of **3a** (220 nm, 20  $\mu$ L injection, manually integrated);  $t_R$  ( $[\text{Ru}(\text{ind})_2\text{Cl}_4]^-$ ) = 8.23 min,  $t_R$  ( $[\text{Ru}(\text{ind})_2\text{Cl}_3(\text{H}_2\text{O})]$ ) = 9.16 min,  $t_R$  ( $[\text{Ru}(\text{ind})_2\text{Cl}_3(\text{ACN})]$ ) = 11.12 min.

## 4.2 Chromatograms of radiolabeled complexes

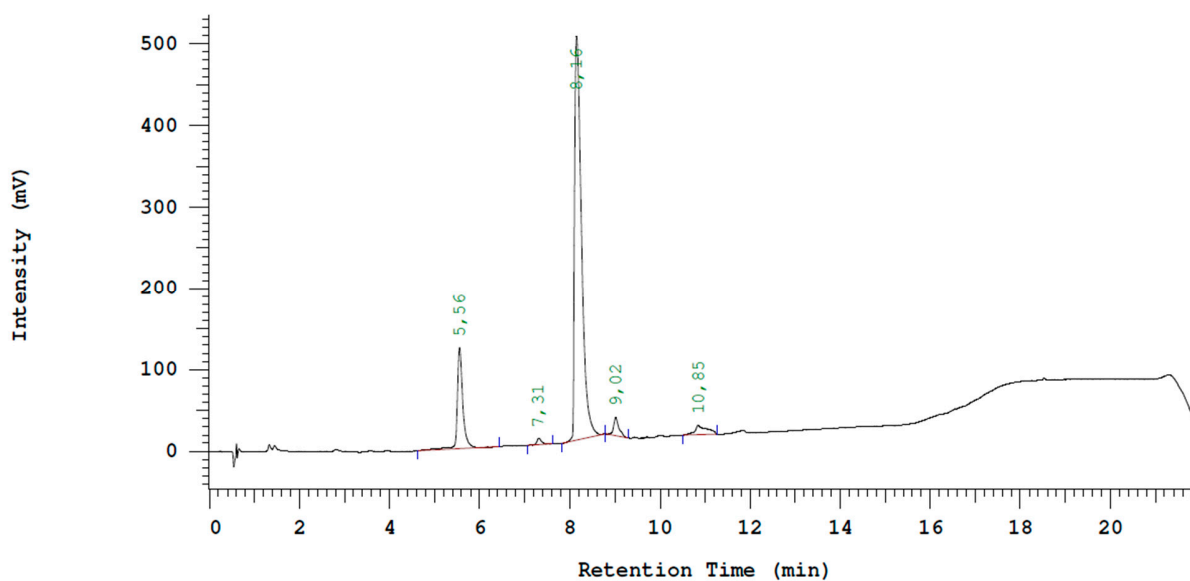

**Figure S8:** UV chromatogram of **1b** (220 nm, 20  $\mu$ L injection, manually integrated);  $t_R$  ( $\text{Hind}^+$ ) = 5.56 min,  $t_R$  ( $[\text{}^{103}\text{Ru}][\text{Ru}(\text{ind})_2\text{Cl}_4]^-$ ) = 8.16 min,  $t_R$  ( $[\text{}^{103}\text{Ru}][\text{Ru}(\text{ind})_2\text{Cl}_3(\text{H}_2\text{O})]$ ) = 9.02 min,  $t_R$  ( $[\text{}^{103}\text{Ru}][\text{Ru}(\text{ind})_2\text{Cl}_3(\text{ACN})]$ ) = 10.85 min.



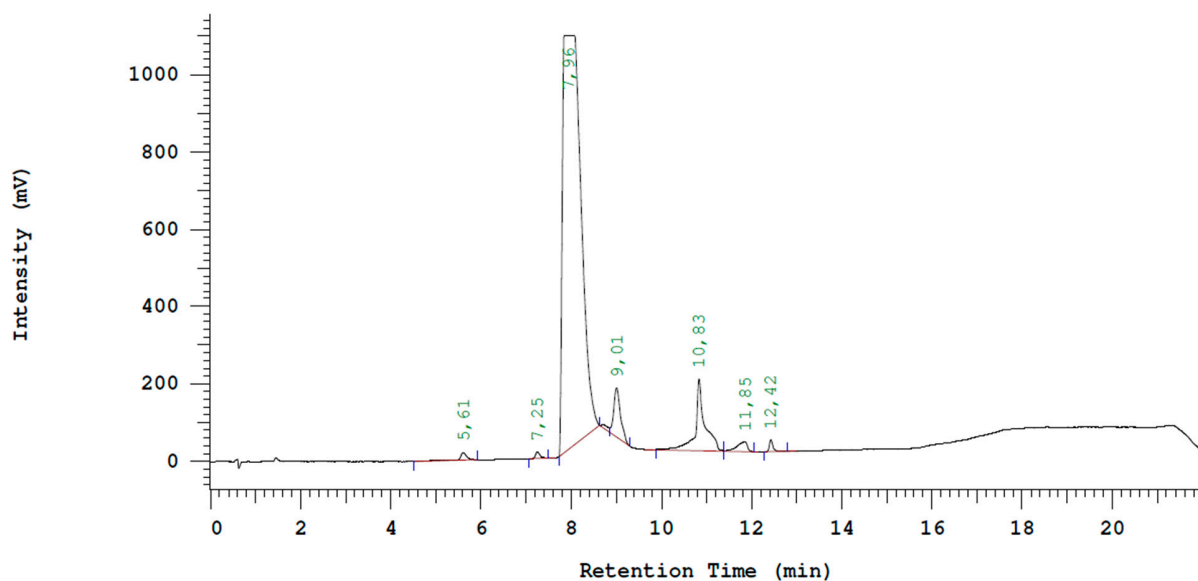

**Figure S9:** UV chromatogram of **2b** (220 nm, 20  $\mu$ L injection, manually integrated);  $t_R$  ( $[^{103}\text{Ru}][\text{Ru}(\text{ind})_2\text{Cl}_4]^-$ ) = 7.96 min,  $t_R$  ( $[^{103}\text{Ru}][\text{Ru}(\text{ind})_2\text{Cl}_3(\text{H}_2\text{O})]$ ) = 9.01 min,  $t_R$  ( $[^{103}\text{Ru}][\text{Ru}(\text{ind})_2\text{Cl}_3(\text{ACN})]$ ) = 10.83 min.

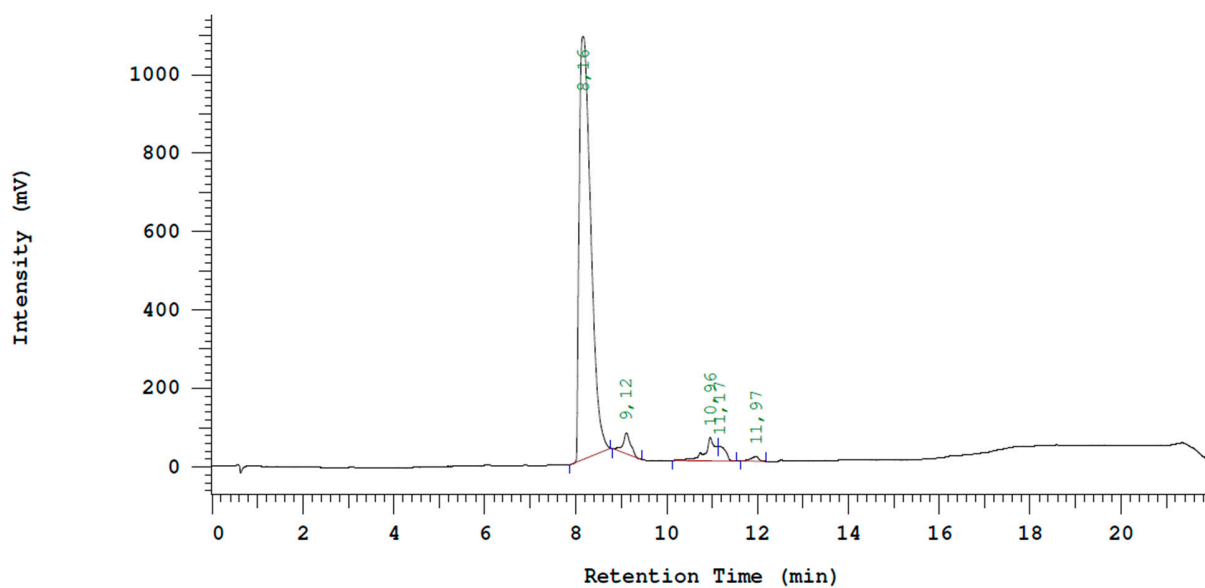

**Figure S10:** UV chromatogram of **3b** (220 nm, 20  $\mu$ L injection, manually integrated);  $t_R$  ( $[^{103}\text{Ru}][\text{Ru}(\text{ind})_2\text{Cl}_4]^-$ ) = 8.16 min,  $t_R$  ( $[^{103}\text{Ru}][\text{Ru}(\text{ind})_2\text{Cl}_3(\text{H}_2\text{O})]$ ) = 9.12 min,  $t_R$  ( $[^{103}\text{Ru}][\text{Ru}(\text{ind})_2\text{Cl}_3(\text{ACN})]$ ) = 10.96, 11.17 min.

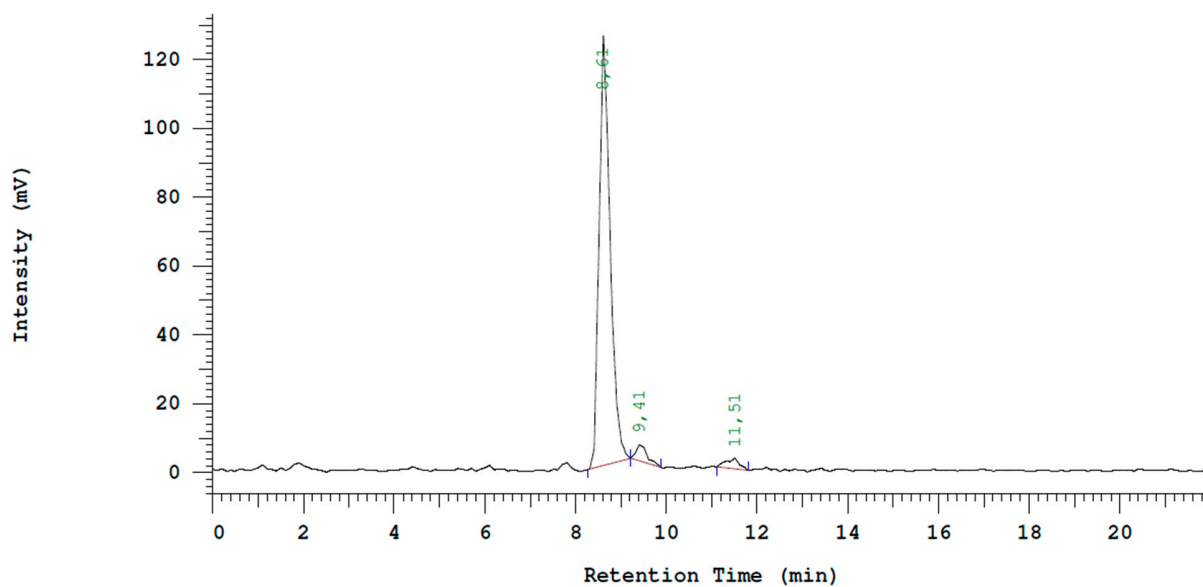

**Figure S11:** Radio chromatogram of **1b** (20  $\mu$ L injection, manually integrated);  $t_R$  ( $[^{103}\text{Ru}][\text{Ru}(\text{ind})_2\text{Cl}_4]^-$ ) = 8.61 min,  $t_R$  ( $[^{103}\text{Ru}][\text{Ru}(\text{ind})_2\text{Cl}_3(\text{H}_2\text{O})]$ ) = 9.41 min,  $t_R$  ( $[^{103}\text{Ru}][\text{Ru}(\text{ind})_2\text{Cl}_3(\text{ACN})]$ ) = 11.51 min.

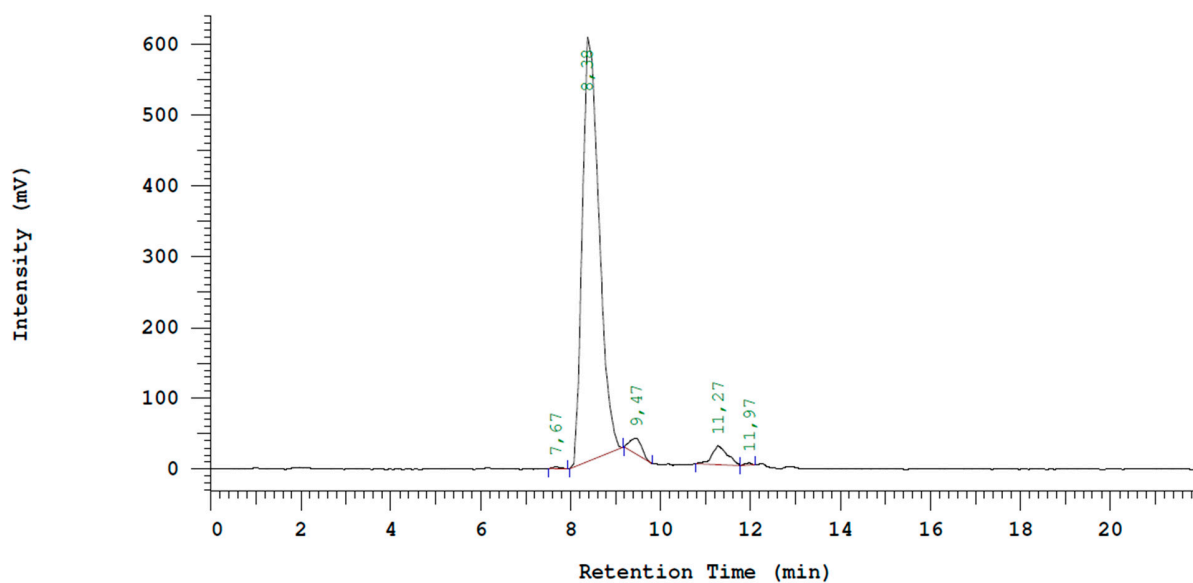

**Figure S12:** Radio chromatogram of **2b** (20  $\mu$ L injection, manually integrated);  $t_R$  ( $[^{103}\text{Ru}][\text{Ru}(\text{ind})_2\text{Cl}_4]^-$ ) = 8.38 min,  $t_R$  ( $[^{103}\text{Ru}][\text{Ru}(\text{ind})_2\text{Cl}_3(\text{H}_2\text{O})]$ ) = 9.47 min,  $t_R$  ( $[^{103}\text{Ru}][\text{Ru}(\text{ind})_2\text{Cl}_3(\text{ACN})]$ ) = 11.27 min.

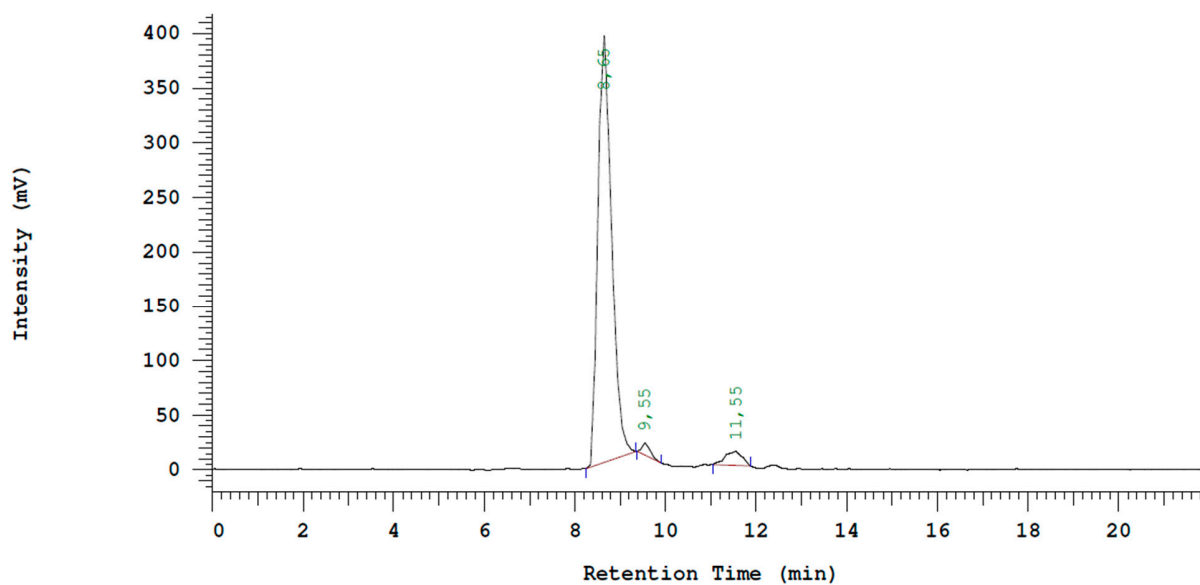

**Figure S13:** Radio chromatogram of **3b** (20  $\mu$ L injection, manually integrated);  $t_R$  ( $[^{103}\text{Ru}][\text{Ru}(\text{ind})_2\text{Cl}_4]^-$ ) = 8.65 min,  $t_R$  ( $[^{103}\text{Ru}][\text{Ru}(\text{ind})_2\text{Cl}_3(\text{H}_2\text{O})]$ ) = 9.55 min,  $t_R$  ( $[^{103}\text{Ru}][\text{Ru}(\text{ind})_2\text{Cl}_3(\text{ACN})]$ ) = 11.55 min.

## 5. Cell viability curves

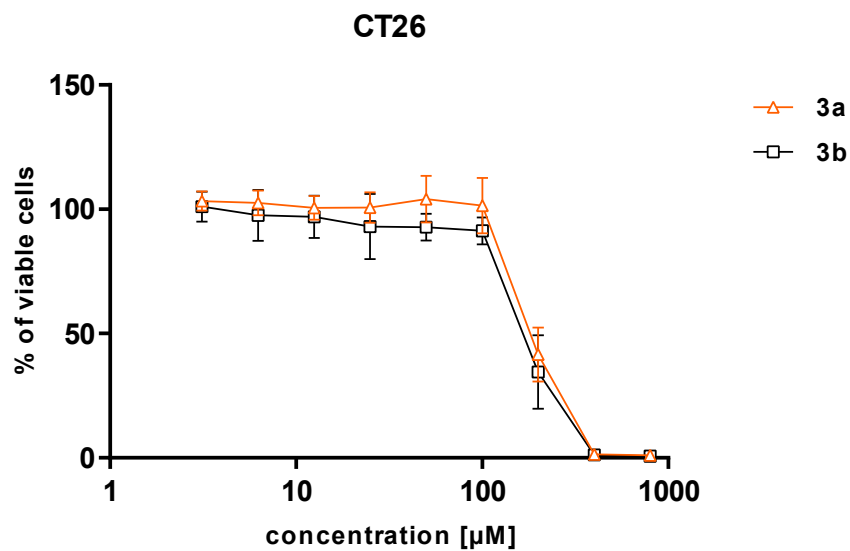

**Figure S14:** Cytotoxicity of **3a** (BOLD-100) and **3b** ( $[^{103}\text{Ru}]\text{BOLD-100}$ ) in CT26 cell line. Values are mean  $\pm$  standard deviations of  $n = 5$  (**3a**) and  $n = 3$  (**3b**) representative experiments performed in triplicates.

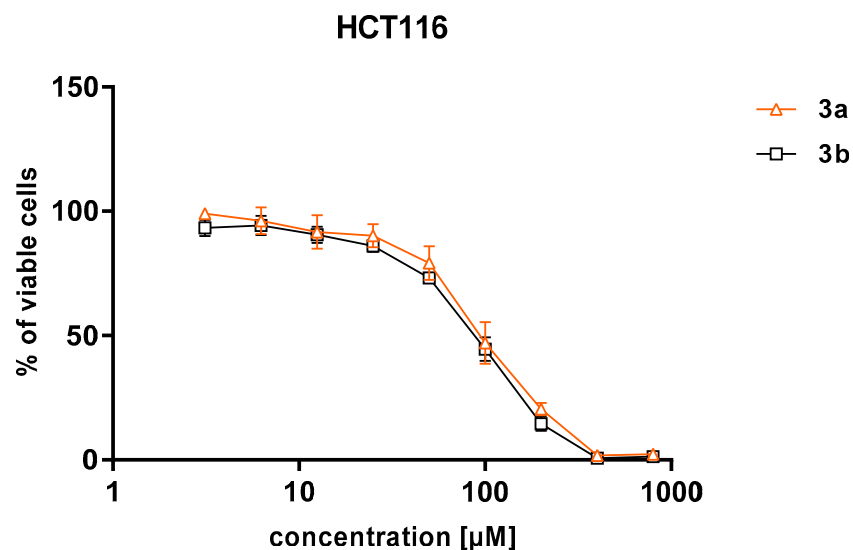

**Figure S15:** Cytotoxicity of **3a** (BOLD-100) and **3b** ( $[^{103}\text{Ru}]$ BOLD-100) HCT116 cell line. Values are mean  $\pm$  standard deviations of  $n = 6$  (**3a**) and  $n = 3$  (**3b**) representative experiments performed in triplicates.

## 6. Biodistribution data

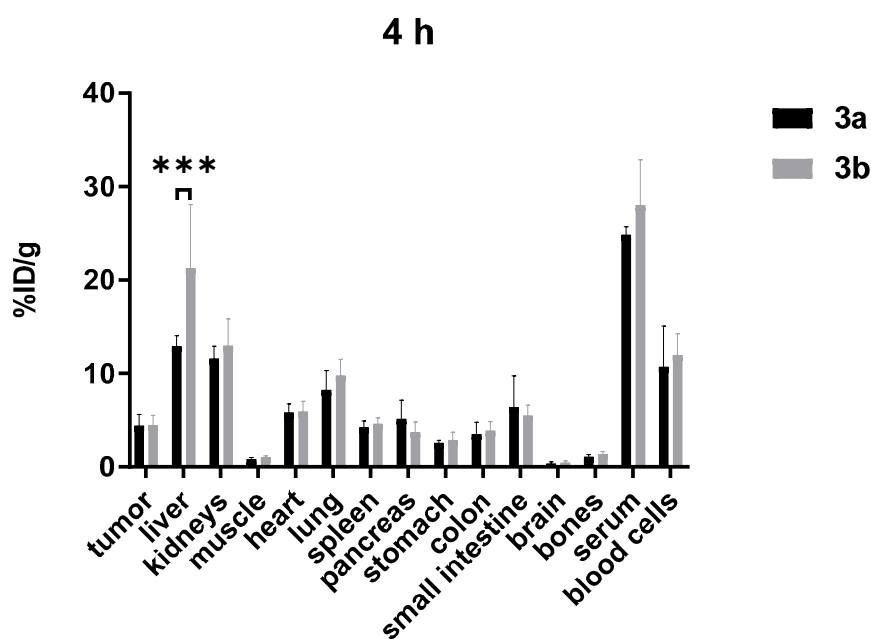

**Figure S16:** Tissue distribution of **3a** (BOLD-100) and **3b** ( $[^{103}\text{Ru}]$ BOLD-100) 4 h p.i. (%ID/g = percent injected dose of  $^{nat/103}\text{Ru}$  per gram tissue). Values are means, error bars represent standard deviations of  $n \geq 2$  (**3a**) and  $n \geq 4$  (**3b**). Comparison of data was performed by using a two-way ANOVA with Sidak's correction. Values of  $p < 0.05$  were considered as statistically significant (\*\*\*) ( $p \leq 0.001$ ).

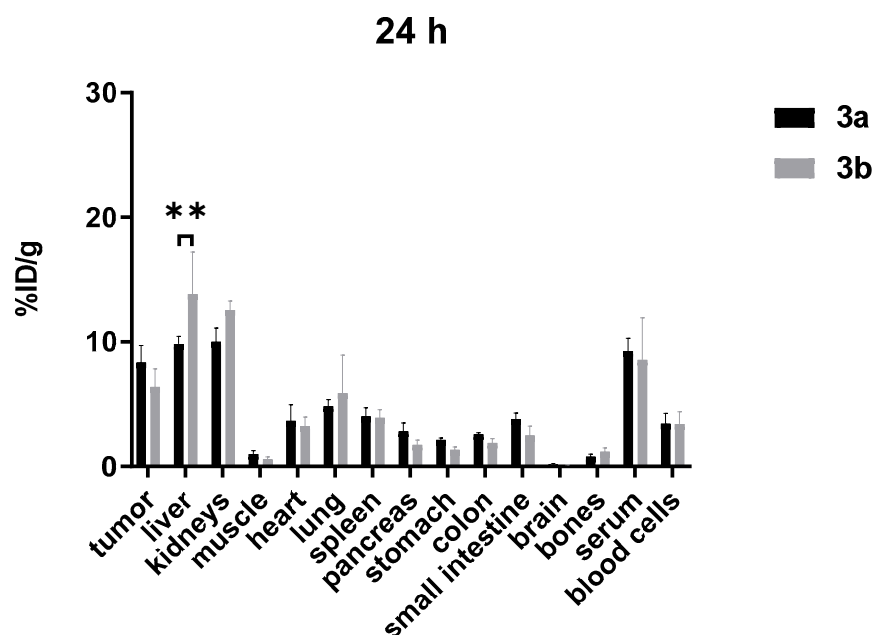

**Figure S17:** Tissue distribution of **3a** (BOLD-100) and **3b** ( $[^{103}\text{Ru}]$ BOLD-100) 24 h p.i. (%ID/g = percent injected dose of  $^{nat/103}\text{Ru}$  per gram tissue). Values are means, error bars represent standard deviations of  $n = 3$  (**3a**) and  $n = 4$  (**3b**). Comparison of data was performed by using a two-way ANOVA with Sidak's correction. Values of  $p < 0.05$  were considered as statistically significant (\*\*  $p \leq 0.01$ ).

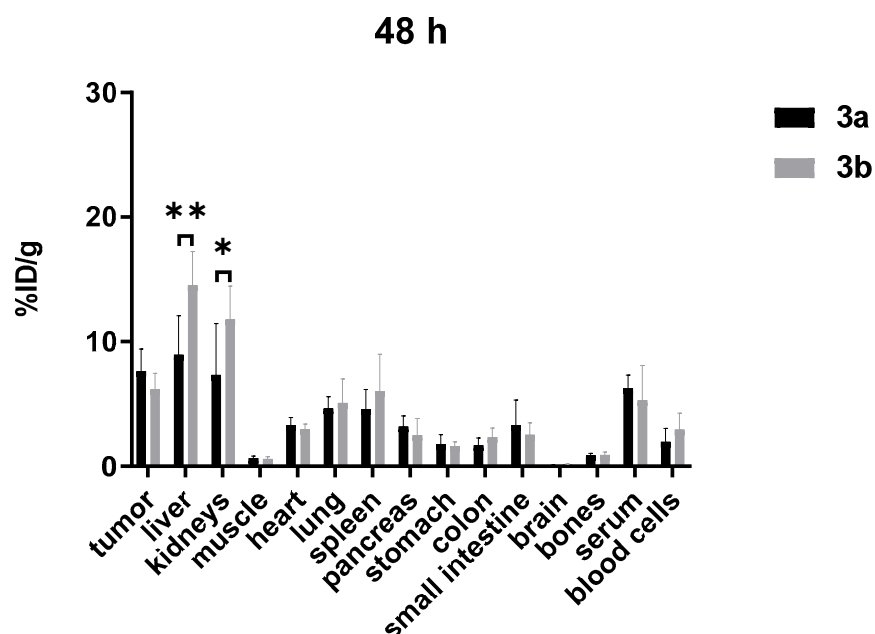

**Figure S18:** Tissue distribution of **3a** (BOLD-100) and **3b** ( $[^{103}\text{Ru}]$ BOLD-100) 48 h p.i. (%ID/g = percent injected dose of  $^{nat/103}\text{Ru}$  per gram tissue). Values are means, error bars represent standard deviations of  $n \geq 2$ .

(**3a**) and  $n \geq 3$  (**3b**). Comparison of data was performed by using a two-way ANOVA with Sidak's correction. Values of  $p < 0.05$  were considered as statistically significant (\*  $p \leq 0.05$ , \*\*  $p \leq 0.01$ ).

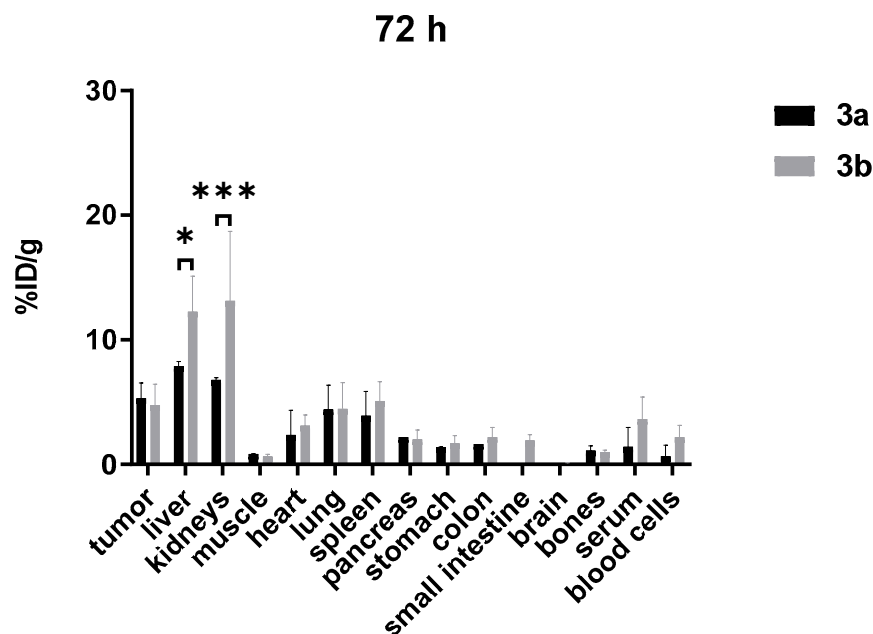

**Figure S19:** Tissue distribution of **3a** (BOLD-100) and **3b** ( $[^{103}\text{Ru}]$ BOLD-100) 72 h p.i. (%ID/g = percent injected dose of  $^{nat/103}\text{Ru}$  per gram tissue). Values are means, error bars represent standard deviations of  $n = 2$  (**3a**) and  $n = 8$  (**3b**). Comparison of data was performed by using a two-way ANOVA with Sidak's correction. Values of  $p < 0.05$  were considered as statistically significant (\*  $p \leq 0.05$ , \*\*\*  $p \leq 0.001$ ). Data of **3a** for small intestine could not be obtained, due to raw data inconsistency.

**Table S2:** Tissue distribution data of **3a** (BOLD-100) and **3b** ( $^{103}\text{Ru}$ ]BOLD-100) in CT26 bearing Balb/c mice over 72 h. Values are means  $\pm$  standard deviations of  $n \geq 2$  (**3a**) and  $n \geq 3$  (**3b**). %ID/g = percent injected dose of  $^{nat/103}\text{Ru}$  per gram tissue.

| Tissue          | %ID/g tissue |            |           |            |           |            |           |            |
|-----------------|--------------|------------|-----------|------------|-----------|------------|-----------|------------|
|                 | 4 h          |            |           |            | 24 h      |            |           |            |
|                 | <b>3a</b>    |            | <b>3b</b> |            | <b>3a</b> |            | <b>3b</b> |            |
| Tumor           | 4.43         | $\pm$ 1.20 | 4.49      | $\pm$ 1.03 | 8.34      | $\pm$ 1.36 | 6.39      | $\pm$ 1.44 |
| Liver           | 12.90        | $\pm$ 1.14 | 24.41     | $\pm$ 3.17 | 9.84      | $\pm$ 0.60 | 13.83     | $\pm$ 3.38 |
| Kidneys         | 11.58        | $\pm$ 1.35 | 12.98     | $\pm$ 2.87 | 10.02     | $\pm$ 1.09 | 12.55     | $\pm$ 0.74 |
| Muscle          | 0.82         | $\pm$ 0.18 | 1.05      | $\pm$ 0.14 | 0.99      | $\pm$ 0.28 | 0.57      | $\pm$ 0.19 |
| Heart           | 5.81         | $\pm$ 0.94 | 5.93      | $\pm$ 1.10 | 3.66      | $\pm$ 1.31 | 3.24      | $\pm$ 0.73 |
| Lung            | 8.24         | $\pm$ 2.06 | 9.77      | $\pm$ 1.75 | 4.84      | $\pm$ 0.53 | 5.89      | $\pm$ 3.04 |
| Spleen          | 4.23         | $\pm$ 0.68 | 4.63      | $\pm$ 0.61 | 4.02      | $\pm$ 0.71 | 3.92      | $\pm$ 0.66 |
| Pancreas        | 5.14         | $\pm$ 2.01 | 3.75      | $\pm$ 1.07 | 2.81      | $\pm$ 0.68 | 1.74      | $\pm$ 0.39 |
| Stomach         | 2.57         | $\pm$ 0.29 | 2.88      | $\pm$ 0.82 | 2.13      | $\pm$ 0.17 | 1.34      | $\pm$ 0.22 |
| Colon           | 3.53         | $\pm$ 1.27 | 3.89      | $\pm$ 0.96 | 2.58      | $\pm$ 0.13 | 1.88      | $\pm$ 0.37 |
| Small intestine | 6.38         | $\pm$ 3.36 | 5.49      | $\pm$ 1.12 | 3.78      | $\pm$ 0.51 | 2.49      | $\pm$ 0.76 |
| Brain           | 0.36         | $\pm$ 0.19 | 0.46      | $\pm$ 0.20 | 0.15      | $\pm$ 0.07 | 0.12      | $\pm$ 0.02 |
| Bones           | 1.08         | $\pm$ 0.25 | 1.34      | $\pm$ 0.30 | 0.79      | $\pm$ 0.20 | 1.19      | $\pm$ 0.29 |
| Serum           | 24.85        | $\pm$ 0.85 | 28.02     | $\pm$ 4.87 | 9.26      | $\pm$ 1.03 | 8.57      | $\pm$ 3.37 |
| Blood cells     | 10.70        | $\pm$ 4.38 | 11.98     | $\pm$ 2.26 | 3.43      | $\pm$ 0.83 | 3.41      | $\pm$ 0.97 |

  

| Tissue          | %ID/g tissue |            |           |            |           |            |           |            |
|-----------------|--------------|------------|-----------|------------|-----------|------------|-----------|------------|
|                 | 48 h         |            |           |            | 72 h      |            |           |            |
|                 | <b>3a</b>    |            | <b>3b</b> |            | <b>3a</b> |            | <b>3b</b> |            |
| Tumor           | 7.64         | $\pm$ 1.78 | 6.19      | $\pm$ 1.26 | 5.32      | $\pm$ 1.22 | 4.77      | $\pm$ 1.68 |
| Liver           | 8.96         | $\pm$ 3.11 | 14.54     | $\pm$ 2.69 | 7.90      | $\pm$ 0.35 | 12.26     | $\pm$ 2.85 |
| Kidneys         | 7.34         | $\pm$ 4.13 | 11.79     | $\pm$ 2.66 | 6.78      | $\pm$ 0.18 | 13.14     | $\pm$ 5.56 |
| Muscle          | 0.66         | $\pm$ 0.16 | 0.60      | $\pm$ 0.16 | 0.84      | $\pm$ 0.02 | 0.65      | $\pm$ 0.17 |
| Heart           | 3.28         | $\pm$ 0.63 | 2.98      | $\pm$ 0.41 | 2.37      | $\pm$ 1.97 | 3.12      | $\pm$ 0.84 |
| Lung            | 4.64         | $\pm$ 0.94 | 5.08      | $\pm$ 1.93 | 4.41      | $\pm$ 1.94 | 4.47      | $\pm$ 2.10 |
| Spleen          | 4.59         | $\pm$ 1.57 | 6.01      | $\pm$ 2.98 | 3.92      | $\pm$ 1.93 | 5.08      | $\pm$ 1.56 |
| Pancreas        | 3.18         | $\pm$ 0.85 | 2.50      | $\pm$ 1.33 | 2.19      | $\pm$ 0.01 | 2.01      | $\pm$ 0.75 |
| Stomach         | 1.76         | $\pm$ 0.77 | 1.60      | $\pm$ 0.36 | 1.40      | $\pm$ 0.01 | 1.69      | $\pm$ 0.64 |
| Colon           | 1.68         | $\pm$ 0.58 | 2.34      | $\pm$ 0.72 | 1.63      | $\pm$ 0.00 | 2.19      | $\pm$ 0.77 |
| Small intestine | 3.28         | $\pm$ 2.02 | 2.54      | $\pm$ 0.95 | 0.00      | $\pm$ 0.00 | 1.92      | $\pm$ 0.47 |
| Brain           | 0.10         | $\pm$ 0.02 | 0.13      | $\pm$ 0.05 | 0.11      | $\pm$ 0.00 | 0.09      | $\pm$ 0.05 |
| Bones           | 0.88         | $\pm$ 0.16 | 0.90      | $\pm$ 0.24 | 1.12      | $\pm$ 0.35 | 1.00      | $\pm$ 0.15 |
| Serum           | 6.29         | $\pm$ 1.02 | 5.31      | $\pm$ 2.78 | 1.41      | $\pm$ 1.56 | 3.63      | $\pm$ 1.78 |
| Blood cells     | 1.96         | $\pm$ 1.09 | 2.94      | $\pm$ 1.32 | 0.67      | $\pm$ 0.86 | 2.19      | $\pm$ 0.96 |

**Table S3:** Tumor-to-organ ratio of **3b** ( $[^{103}\text{Ru}]$ BOLD-100). Values are means  $\pm$  standard deviations.

| Organ           | tumor/organ ratio of $[^{103}\text{Ru}]$ BOLD-100 ( <b>3b</b> ) |                |                 |                 |
|-----------------|-----------------------------------------------------------------|----------------|-----------------|-----------------|
|                 | 4 h                                                             | 24 h           | 48 h            | 72 h            |
| Liver           | 0.2 $\pm$ 0.2                                                   | 0.5 $\pm$ 0.1  | 0.4 $\pm$ 0.1   | 0.4 $\pm$ 0.1   |
| Kidneys         | 0.4 $\pm$ 0.1                                                   | 0.5 $\pm$ 0.1  | 0.5 $\pm$ 0.1   | 0.4 $\pm$ 0.2   |
| Muscle          | 4.4 $\pm$ 1.4                                                   | 11.4 $\pm$ 1.8 | 10.6 $\pm$ 1.4  | 7.6 $\pm$ 2.4   |
| Heart           | 0.8 $\pm$ 0.2                                                   | 2.0 $\pm$ 0.2  | 2.1 $\pm$ 0.2   | 1.5 $\pm$ 0.4   |
| Lung            | 0.5 $\pm$ 0.2                                                   | 1.3 $\pm$ 0.5  | 1.3 $\pm$ 0.3   | 1.2 $\pm$ 0.4   |
| Spleen          | 1.0 $\pm$ 0.2                                                   | 1.7 $\pm$ 0.3  | 1.1 $\pm$ 0.3   | 1.0 $\pm$ 0.3   |
| Pancreas        | 1.2 $\pm$ 0.3                                                   | 3.7 $\pm$ 0.7  | 2.7 $\pm$ 0.7   | 2.6 $\pm$ 0.9   |
| Stomach         | 1.7 $\pm$ 0.7                                                   | 4.8 $\pm$ 1.2  | 3.9 $\pm$ 0.3   | 3.0 $\pm$ 1.0   |
| Fat             | 5.1 $\pm$ 2.1                                                   | 10.3 $\pm$ 2.1 | 13.3 $\pm$ 5.0  | 8.6 $\pm$ 3.5   |
| Colon           | 1.2 $\pm$ 0.6                                                   | 3.4 $\pm$ 0.7  | 2.8 $\pm$ 0.8   | 2.3 $\pm$ 0.8   |
| Small intestine | 0.9 $\pm$ 0.3                                                   | 2.8 $\pm$ 1.1  | 2.6 $\pm$ 0.8   | 2.6 $\pm$ 0.9   |
| Brain           | 10.7 $\pm$ 3.3                                                  | 51.9 $\pm$ 4.4 | 53.3 $\pm$ 14.3 | 54.3 $\pm$ 15.1 |
| Bones           | 3.4 $\pm$ 0.5                                                   | 5.4 $\pm$ 0.6  | 7.0 $\pm$ 0.8   | 4.9 $\pm$ 1.7   |
| Serum           | 0.2 $\pm$ 0.0                                                   | 0.8 $\pm$ 0.1  | 1.3 $\pm$ 0.4   | 1.4 $\pm$ 0.3   |
| Blood cells     | 0.4 $\pm$ 0.1                                                   | 2.0 $\pm$ 0.6  | 2.3 $\pm$ 0.6   | 2.3 $\pm$ 0.8   |

## 7. References

1. Vojkovsky, T.; Sill, K.; Carie, A. Manufacture of trans-[tetrachlorobis(1h-indazole)ruthenate (iii)] and compositions thereof, *WO2018204930A1*, 08.11.2018.
